# Supplementary material
Source: publisher site journal article supplement (https://www.dovepress.com/article/243381)
Supplement: Supplementary file 1 [file get_supplementary_file.php]

**Supplementary Table 1:** Baseline Characteristics of the Participants with Different UA Levels

|  | Normal UA | hyperuricemia | *P* Value |
| --- | --- | --- | --- |
| Number, (%) | 8 241(85.1) | 1 439(14.9) | **<0.001** |
| Age, (years) Mean±SD | 51.1±10.5 | 52.7±11.0 | **<0.001** |
| School years＞9, n (%) | 2 371(28.9) | 511(35.6) | **<0.001** |
| Unmarried, n (%) | 445(5.5) | 92(6.5) | 0.124 |
| Rural living, n (%) | 5 262(63.9) | 804(55.9) | **<0.001** |
| Personal monthly income (CNY), n (%) |  |  | **<0.001** |
| ≤599 | 3 888(49.1) | 544(39.1) |  |
| 600～1999 | 3 416(43.2) | 660(47.4) |  |
| ≥2000 | 609(7.7) | 187(13.4) |  |
| Current Smoking, n (%) | 1 775(21.8) | 359(25.2) | **0.005** |
| Current Alcohol-drinking, n (%) | 1 326(16.2) | 378(26.3) | **<0.001** |
| BMI (kg/m2) Mean±SD | 25.1±3.5 | 26.8±3.7 | **<0.001** |
| TG (mmol/L) Mean (95%CI) | 1.33(1.31,1.35) | 1.97(1.90,2.04) | **<0.001** |
| TC (mmol/L) Mean (95%CI) | 5.24(5.22,5.26) | 5.53(5.47,5.58) | **<0.001** |
| HDL (mmol/L) Mean (95%CI) | 1.65(1.64,1.65) | 1.57(1.55,1.59) | **<0.001** |
| UA (μmol/L) Mean (95%CI) | 283.8(282.4,285.1) | 442.7(439.6,445.7) | **<0.001** |

***Note:*** BMI: body mass index; HUA: hyperuricemia; TG: triglycerides; TC: total cholesterol; SD: standard deviation; UA: uric acid .
